# Supplementary material for: Bone Morphogenic Protein 2-Loaded Porous Silicon Carriers for Osteoinductive Implants
Source: Pharmaceutics. 2019 Nov 12;11(11):602. doi: 10.3390/pharmaceutics11110602 (PMC6920899; doi:10.3390/pharmaceutics11110602)
Supplement: Supplementary file 1 [file pharmaceutics-11-00602-s001.pdf]

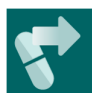

# Supplementary Materials: Bone Morphogenic Protein 2-Loaded Porous Silicon Carriers for Osteoinductive Implants

Michal Rosenberg, Dekel Shilo, Leonid Galperin, Tal Capucha, Karim Tarabieh, Adi Rachmiel and Ester Segal

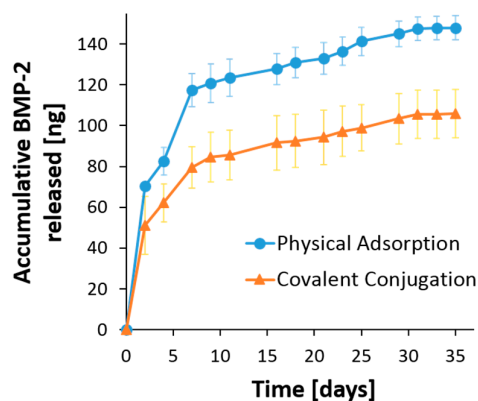

**Figure 1.** BMP-2 release from PSiO<sub>2</sub> carriers that were loaded by physical adsorption vs. covalent attachment of the protein, expressed as the accumulative BMP-2 mass released over time.

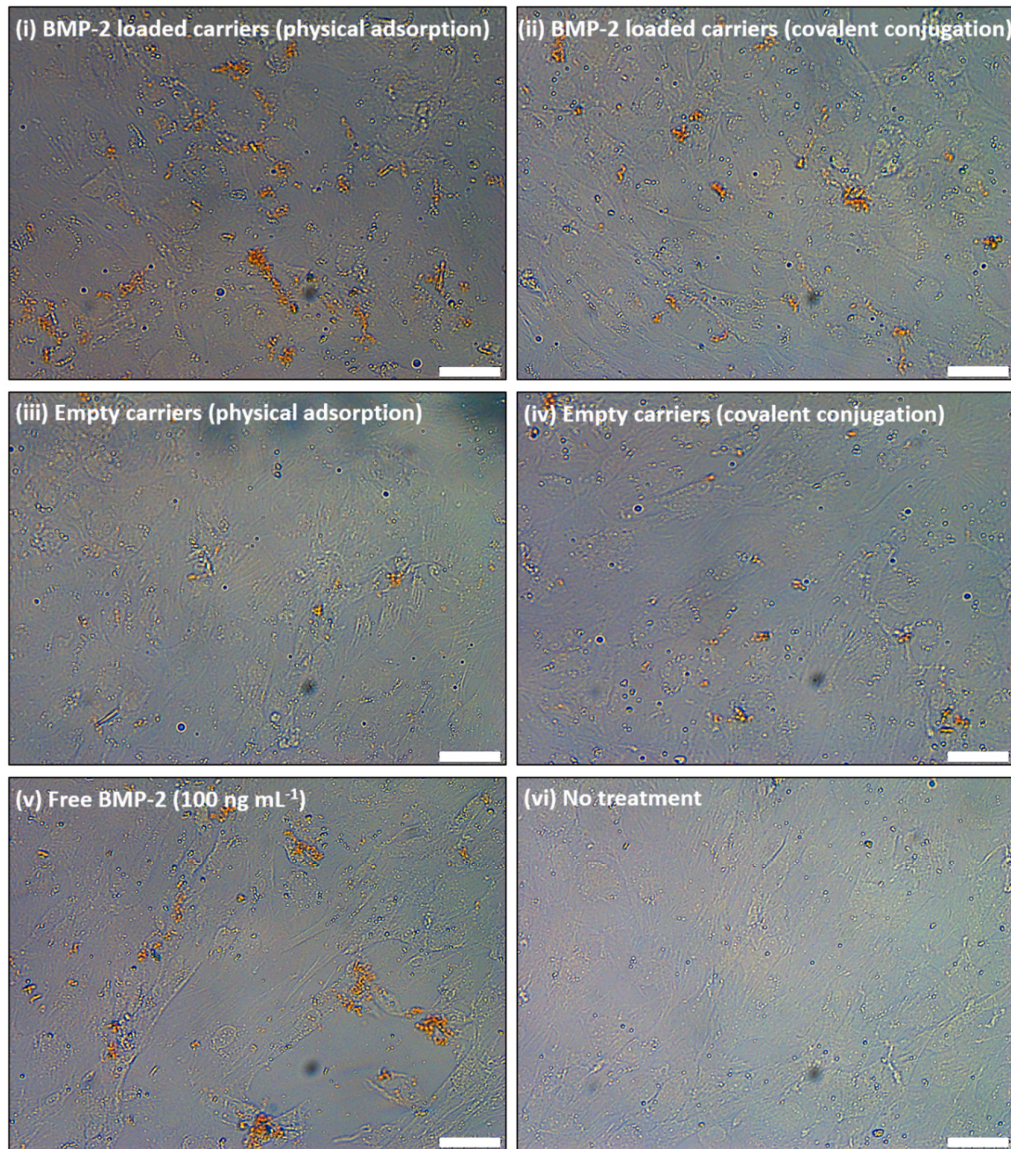

**Figure S2.** ALP staining of differentiated BM-MSCs after 14 days. Representative light micrographs of cells exposed to (i) BMP-2-loaded  $\text{PSiO}_2$  carriers via physical adsorption, (ii) BMP-2-loaded  $\text{PSiO}_2$  carriers via covalent conjugation, (iii) empty  $\text{PSiO}_2$  carriers, (iv) empty chemically-modified  $\text{PSiO}_2$  carriers, (v) free BMP-2 solution ( $100 \text{ ng mL}^{-1}$ ) and (vi) no treatment (control, cells only). Scale bar =  $75 \mu\text{m}$ .
